# Supplementary material for: Knockdown of brain-derived neurotrophic factor in specific brain sites precipitates behaviors associated with depression and reduces neurogenesis
Source: PubMed Central journal article supplement — Mol Psychiatry. 2009 Jul 21;15(1):80–92. doi: 10.1038/mp.2009.67 (PMC2834321; doi:10.1038/mp.2009.67), 2009-07-21
Supplement: mp200967x1.pdf [file mp200967x1.pdf]

## Appendix 1: RNAi

RNAi is a naturally occurring process in which double stranded RNAs (dsRNAs) are processed into small (19-25 bp) interfering RNAs (siRNAs) and then incorporated into a silencing complex that selects and degrades homologous mRNA<sup>1</sup>. The use of exogenous siRNA delivery into mammalian cells is rather limited though, since the effects of siRNAs are transient and restricted by the rate of cell division<sup>2,3</sup>. However, more permanent knockdown can be achieved by expressing siRNA precursors, such as short hairpin RNAs (shRNAs), in lentiviral vector (LV) constructs<sup>2,4</sup>. These shRNAs are processed and cleaved by the host's cellular machinery into functional siRNAs<sup>2,5</sup>.

1. Fire, A., *et al.* Potent and specific genetic interference by double-stranded RNA in *Caenorhabditis elegans*. *Nature* **391**, 806-811 (1998).
2. Brummelkamp, T.R., Bernards, R. & Agami, R. A system for stable expression of short interfering RNAs in mammalian cells. *Science* **296**, 550-553 (2002).
3. Hannon, G.J. & Rossi, J.J. Unlocking the potential of the human genome with RNA interference. *Nature* **431**, 371-378 (2004).
4. Yu, J.Y., DeRuiter, S.L. & Turner, D.L. RNA interference by expression of short-interfering RNAs and hairpin RNAs in mammalian cells. *Proc Natl Acad Sci U S A* **99**, 6047-6052 (2002).
5. Siolas, D., *et al.* Synthetic shRNAs as potent RNAi triggers. *Nat Biotechnol* **23**, 227-231 (2005).
